# Supplementary material
Source: publisher figshare collection journal article supplement (https://sage.figshare.com/ndownloader/files/14885081)
Supplement: Supplementary file 1 [file 14885081]

|                   | Trichromatic                                                                        | Protanopia                                                                          | Deuteranopia                                                                         | Tritanopia                                                                            |
|-------------------|-------------------------------------------------------------------------------------|-------------------------------------------------------------------------------------|--------------------------------------------------------------------------------------|---------------------------------------------------------------------------------------|
| <b>F1_neutral</b> |                                                                                     |                                                                                     |                                                                                      |                                                                                       |
| baseline          |    |    |    |    |
| flushed           |    |    |    |    |
| <b>F2_neutral</b> |                                                                                     |                                                                                     |                                                                                      |                                                                                       |
| baseline          |    |    |    |    |
| flushed           |    |    |    |    |
| <b>M1_neutral</b> |                                                                                     |                                                                                     |                                                                                      |                                                                                       |
| baseline          |  |  |  |  |
| flushed           |  |  |  |  |
| <b>M2_neutral</b> |                                                                                     |                                                                                     |                                                                                      |                                                                                       |
| baseline          |  |  |  |  |
| flushed           |  |  |  |  |

|                 | Trichromatic                                                                        | Protanopia                                                                          | Deuteranopia                                                                         | Tritanopia                                                                            |
|-----------------|-------------------------------------------------------------------------------------|-------------------------------------------------------------------------------------|--------------------------------------------------------------------------------------|---------------------------------------------------------------------------------------|
| <b>F1_angry</b> |                                                                                     |                                                                                     |                                                                                      |                                                                                       |
| baseline        |    |    |    |    |
| flushed         |    |    |    |    |
| <b>F2_angry</b> |                                                                                     |                                                                                     |                                                                                      |                                                                                       |
| baseline        |    |    |    |    |
| flushed         |    |    |    |    |
| <b>M1_angry</b> |                                                                                     |                                                                                     |                                                                                      |                                                                                       |
| baseline        |  |  |  |  |
| flushed         |  |  |  |  |
| <b>M2_angry</b> |                                                                                     |                                                                                     |                                                                                      |                                                                                       |
| baseline        |  |  |  |  |
| flushed         |  |  |  |  |

Experiment 1 DVs: “Which face looks more healthy [attractive, angry]?”

Experiment 2 DVs: “How healthy [attractive, angry] does this person look?”, from 1 = *not at all*, to 9 = *very much*
